# Supplementary material for: Influence of Pretreatment on the Performance of Concrete With Coarse Aggregate From Agricultural Waste: A Review
Source: Research Square preprint supplement (doi:10.21203/rs.3.rs-8633222/v1), 2026-02-09
Supplement: Supplementary file 1 [file b097b21a1503d1051b84b6aa.docx]

**Zubair, Toluwalope Dominion1*., Kareem, Mutiu Abiodun1., Ponnle, Glory Olajide1., Adejumo, Divine Favour1., Awolola, Titilayo Ikpemosi1**

**1** Department of Civil Engineering, Faculty of Engineering, Osun State University, Osogbo, Osun State, Nigeria.

*Corresponding Author*:* [toluwalope.zubair@cset.uniosun.edu.ng](mailto:toluwalope.zubair@cset.uniosun.edu.ng)

ORCID:

Zubair Toluwalope Dominion: <https://orcid.org/0009-0003-3498-7747>

Kareem Mutiu Abiodun: <https://orcid.org/0000-0002-9944-2938>

Ponnle Glory Olajide: <https://orcid.org/0009-0002-1015-8525>

Adejumo Divine Favour: <https://orcid.org/0009-0002-0300-9396>

Awolola Titilayo Ikpemosi: <https://orcid.org/0009-0006-4752-1411>
